# Supplementary material for: The Effect of Supplementation with Weizmannia coagulans Strain SANK70258 to Coccidia-Infected Broilers Is Similar to That of a Coccidiostat Administration
Source: Vet Sci. 2022 Aug 3;9(8):406. doi: 10.3390/vetsci9080406 (PMC9416079; doi:10.3390/vetsci9080406)
Supplement: Supplementary file 1 [file vetsci-09-00406-s001.zip › Supplementary Tables S1-S3.xlsx]

## Sheet: Table S1
Table S1 Feed composition and nutrient content of diet in Experiment 1
Ingredient	(%)
Corn	42.23
Sorghum grain	10
Soybean meal	33
Corn gluten meal (CP60%)	4
Fish meal (CP65%)	4
Plant oil	3.5
Calcium tertiary phosphate	1.25
Calcium carbonate	0.8
Sodium chloride	0.2
Choline chloride	0.06
Premix	0.3
L-Lysine HCl	0.2
DL-Methionine	0.3
L-Threonine	0.07
L-Arginine	0.06
L-Valine	0.03
Total	100
Calculated content
Crude protein	24.71
Ca	1
P	0.5
Arg	1.55
His	0.63
Ile	0.97
Lys	1.48
Met	0.7
Met+Cys	1.09
Phe	1.22
Phe+Tyr	2.03
Thr	0.99
Trp	0.28
Leu	2.32
Val	1.14
Pro	1.42
Metabolic energy (Mcal/kg)	3.11

## Sheet: Table_S2
Table S2 Feed compositions and nutrient contents of the experimental diets in Experiment 2
Ingredients (%)	Starter (0-21d)	Grower (21-49d)
Corn	50.55	60.17
Soybean meal	38	28
Corn gluten meal (CP60%)	1	1
Fish meal (CP65%)	3	4
Plant oil	4	3.7
Calcium tertiary phosphate	1.51	1.58
Calcium carbonate	0.76	0.64
Sodium chloride	0.2	0.3
Choline chloride	0.12	0.1
Vitamin mineral premix	0.3	0.3
L-Lysine HCl	0.2	0
DL-Methionine	0.12	0.08
L-Arginine	0.2	0.1
L-Valine	0.01	0
Selenium	0.03	0.03
Total	100	100
Calculated content
Crude protein	24.24	20.73
Ca	1.04	1.02
P	0.73	0.73
Arg	1.74	1.39
His	0.62	0.55
Ile	0.96	0.81
Lys	1.55	1.17
Met	0.49	0.42
Phe	1.18	1.01
Thr	0.91	0.79
Trp	0.28	0.24
Leu	2.08	1.87
Val	1.09	0.94
Pro	1.31	1.18
Metabolic energy (Mcal/kg)	3.08	3.15

## Sheet: Table_S3
Table S3 Primers and PCR cycle conditions used in Experiment 2
		Cycle conditions
Primers	Sequencing	Denaturing	Annealing	Extension	Reference
All bacteria-F	5′-CGGYCCAGACTCCTACGGG-3′	95 °C, 20 s	63 °C, 30 s	72 °C, 45 s	[39]
All bacteria-R	5′-TTACCGCGGCTGCTGGCAC-3′
E. coli-F	5′-CATGCCGCGTGTATGAAGAA-3′	95 °C, 15 s	55 °C, 20 s	-	[40]
E.coli-R	5′-CGGGTAACGTCAATGAGCAAA-3′
Reference 39: Lee, D.H.; Zo, Y.G.; Kim, S.J. Nonradioactive method to study genetic profiles of natural bacterial communities by PCR–sin- gle-strand-conformation polymorphism. Appl. Environ. Microbiol. 1996, 62, 3112–3120. https://doi.org/10.1128/ AEM.62.9.3112-3120.1996.
Reference 40: Huijsdens, X.W.; Linskens, R.K.; Mak, M.; Meuwissen, S.G.; Vandenbroucke-Grauls, C.M.; Savelkoul, P.H. Quantification of bacteria adherent to gastrointestinal mucosa by real-time PCR. J. Clin. Microbiol. 2002, 40, 4423–4427. https://doi.org/10.1128/JCM.40.12.4423-4427.2002.
